# Supplementary material for: Differential regulation of the Epr3 receptor coordinates membrane-restricted rhizobial colonization of root nodule primordia
Source: PubMed Central journal article supplement (PMC5331223; doi:10.1038/ncomms14534), 2017-02-23
Supplement: ncomms14534-s1.pdf [file ncomms14534-s1.pdf]

21 °C

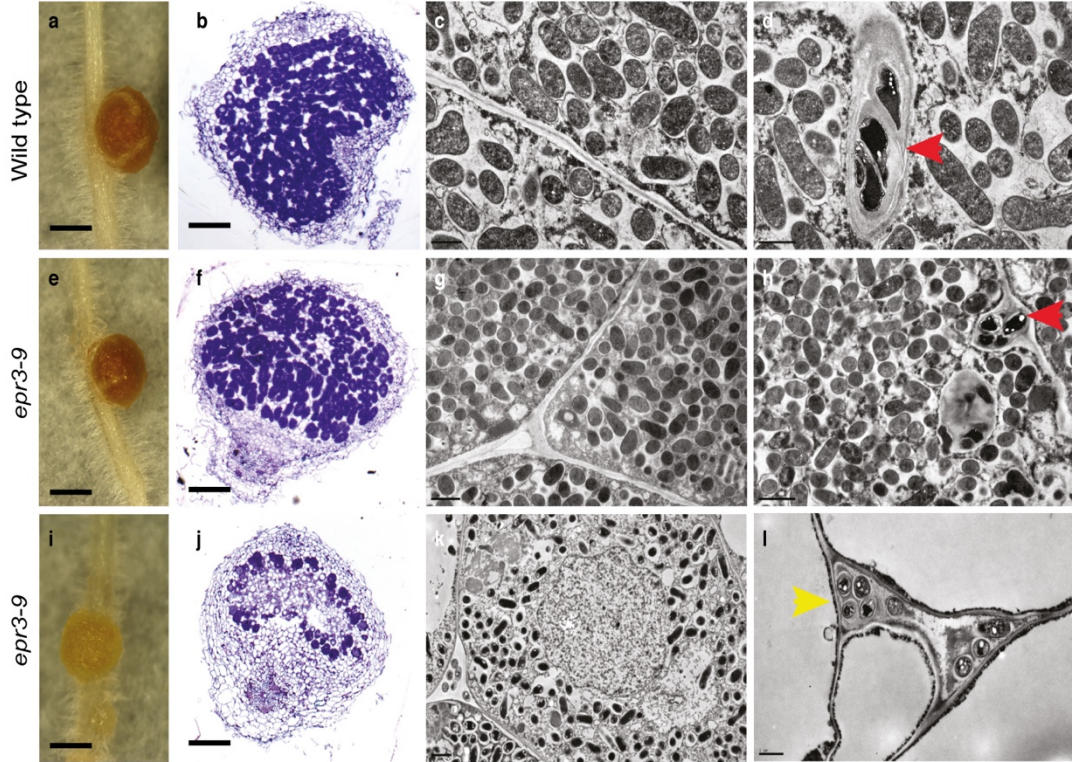

28 °C

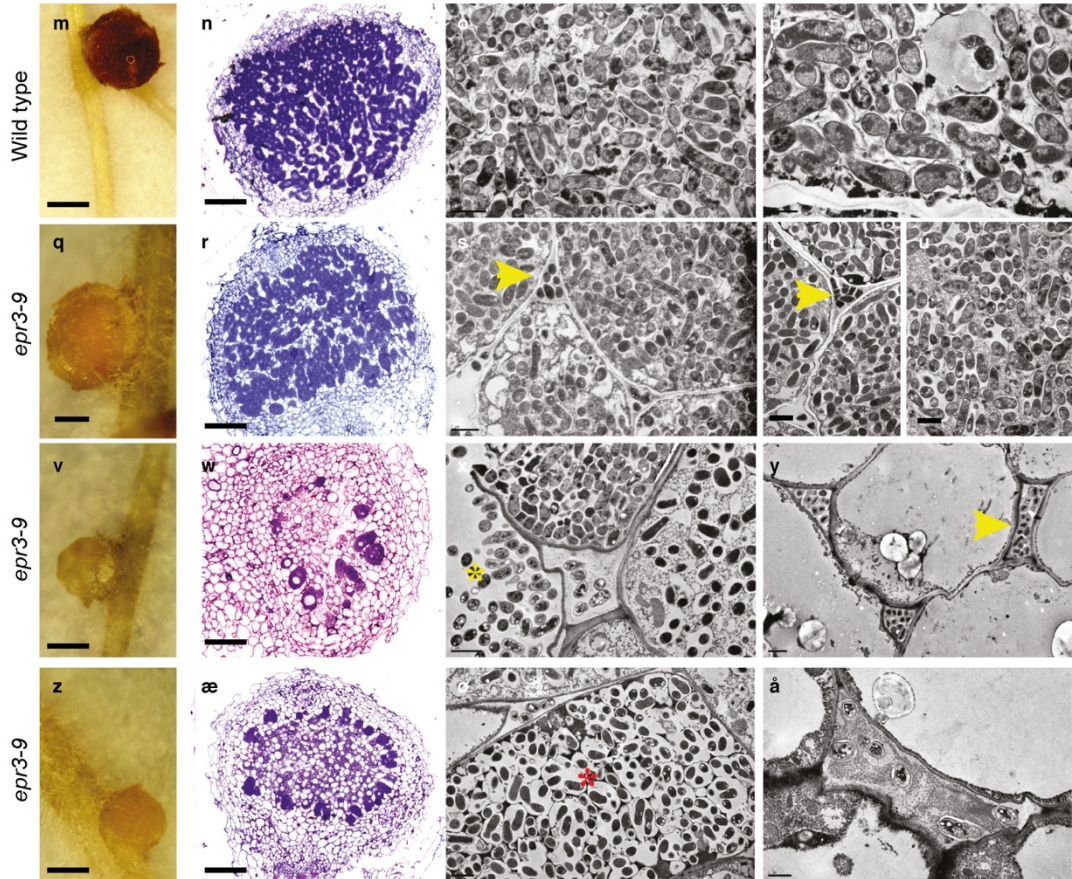

Supplementary Figure 1. Comparison of nodules from Gifu and *epr3-9* plants inoculated with *M. loti* MAFF303099 and incubated at 21 °C or 28 °C.

(a to l) are at 21 °C, and (m to ð) are at 28°C. (a, e, i, m, q, v, z) Visual appearance of representative wild-type (Gifu) and *epr3-9* nodules (28 dpi). (b, f, j, n, r, w, æ) Light microscopy of the sectioned nodules shows the infection pattern. (c, d, g, h, k, l, o, p, s, t, u, x, y, ø, ð) Transmission electron micrographs show the bacteroids enclosed in the symbiosome membrane and (d, h) infection threads (red arrows) containing rhizobia. (l, s, t, y) Nodules of *epr3-9* with infections between cells (yellow arrows). In *epr3-9* nodules, symbiosomes containing several bacteroids and infections between cells are frequently observed at 28°C. (x) Several cells appeared to be undergoing degradation (yellow star). (Ø) Several bacteroids enclosed within the same symbiosome membrane (red star). Scale bars: 500 µm (a, e, i, m, q, v, z), 200 µm (b, f, j, n, r, w, æ), 2 µm (g, h, k, o, s, t, u, j, x, y, ø), and 1 µm (c, d, ð).

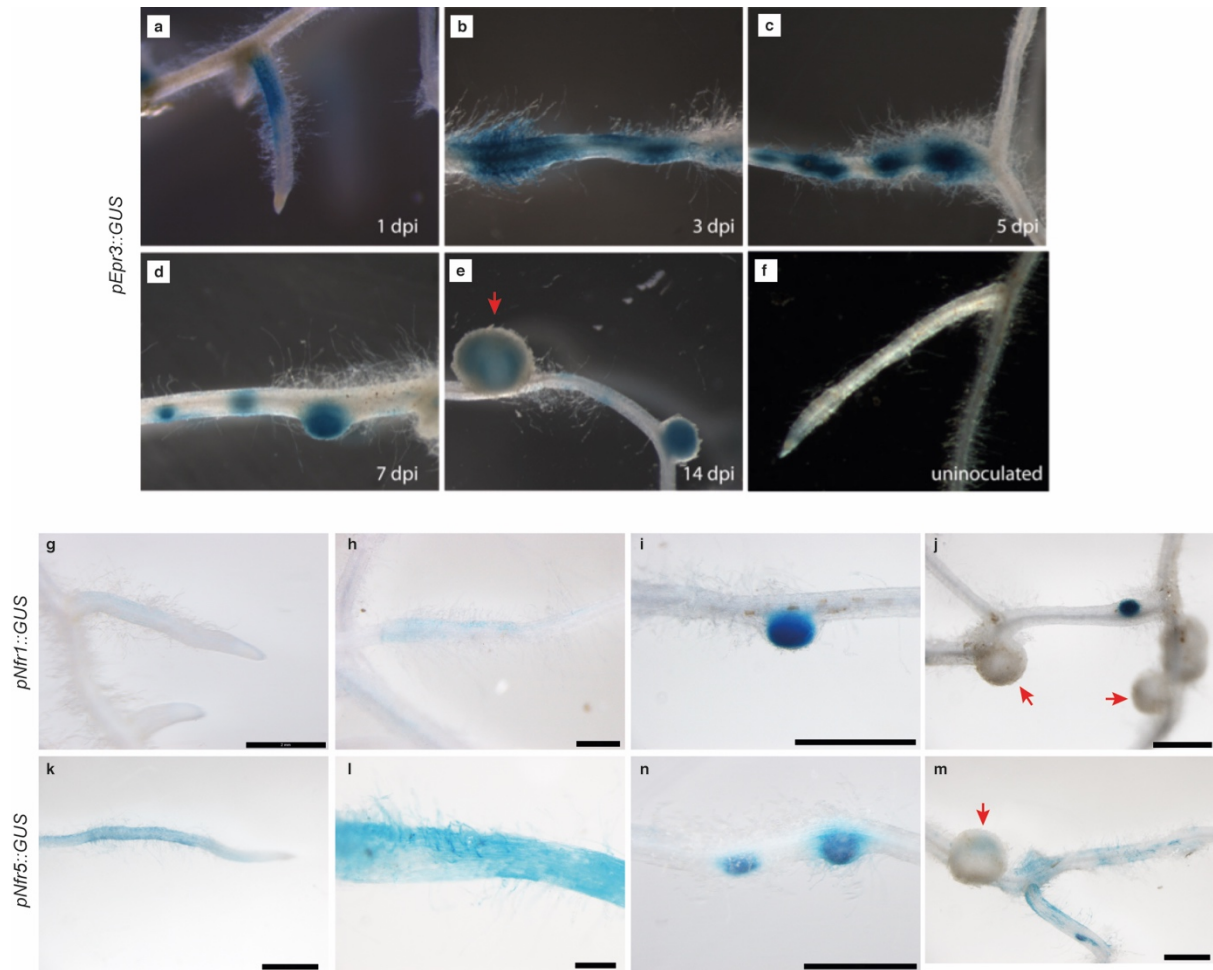

**Supplementary Figure 2. *pEpr3::GUS*, *pNfr1::GUS* and *pNfr5::GUS* activity in Gifu in response to *M. loti*.**

Wild-type plants transformed with the *pEpr3::GUS* reporter (a-f), *pNfr1::GUS* (g-j) and *pNfr5::GUS* (k-m) were inoculated with *M. loti* and stained for GUS activity at time points (a) 1 dpi, (b) 3 dpi, (c) 5 dpi, (d) 7 dpi and (e) 14 dpi. (f) Uninoculated *pEpr3::GUS* transformed wild-type showed no staining. (h, i, j, l, n, m) 7 dpi or 21 dpi. (g, k) Uninoculated roots expressing *pNfr1::GUS* and *pNfr5::GUS* are shown. *pEpr3::GUS*, *pNfr1::GUS* and *pNfr5::GUS* activity are lower and cease in older nodules (red arrows). Scale bars are 2 mm, except for h-1 mm and l- 0,5 mm.

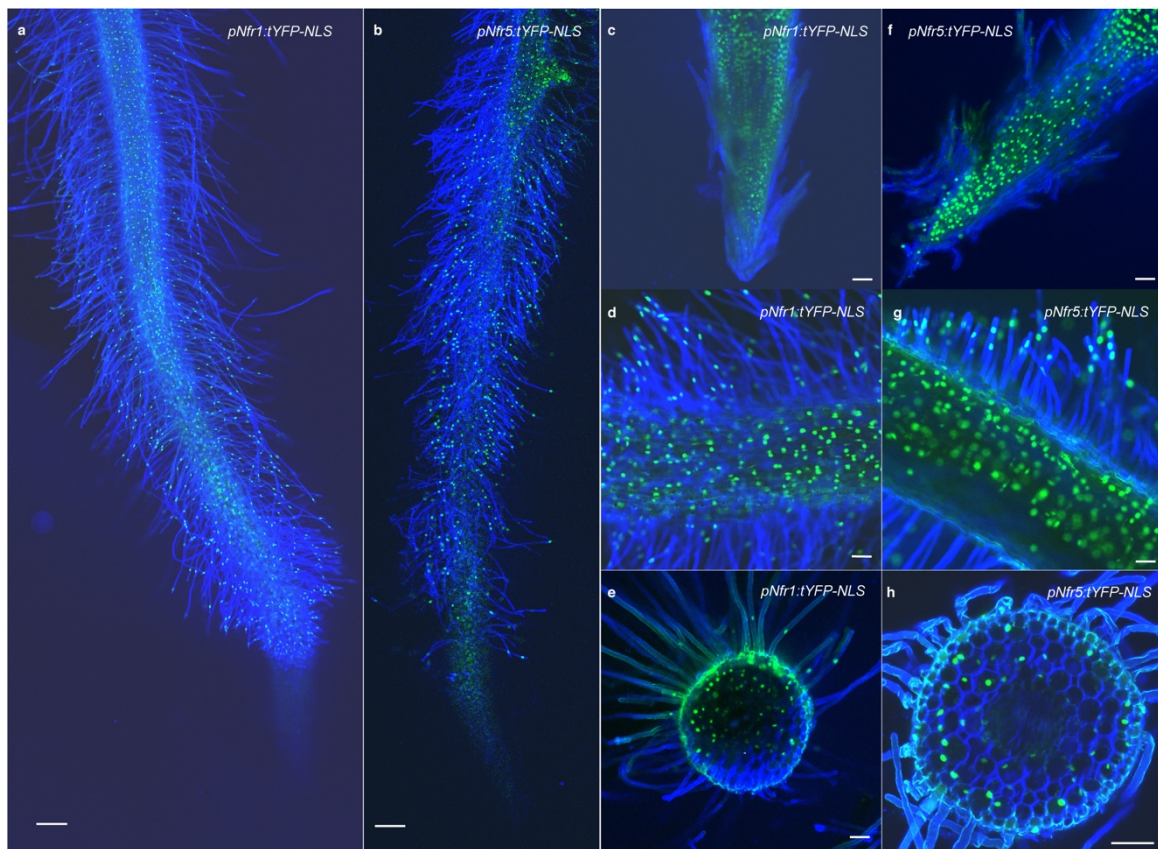

**Supplementary Figure 3. *pNfr1:tYFP-NLS* and *pNfr5:tYFP-NLS* activity in uninoculated Gifu roots.**

Gifu roots transformed with *pNfr1:tYFP-NLS* (**a, c, d, e**) and *pNfr5:tYFP-NLS* (**b, f, g, h**). **e** and **h** are cross sections. **a, b**; scale bars are 200  $\mu\text{m}$ , **c-h**; scale bars are 50  $\mu\text{m}$ .

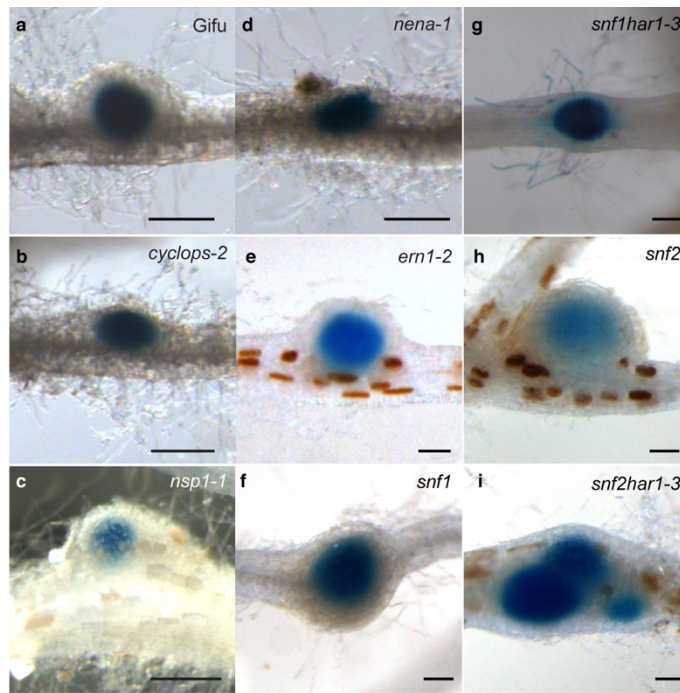

**Supplementary Figure 4. Activity of *pEpr3:GUS* in nodule primordia of *Lotus* mutants.** *Lotus* mutants transformed with *pEpr3:GUS*. (a) Gifu, (b) *cyclops-2*, (c) *nsp1-1*, (d) *nena-1*, (e) *ern1-2*, (f) *snf1*, (g) *snf1har1-3*, (h) *snf2* and (i) *snf2har1-3*. (a to e) are 10 to 21 dpi with R7A. (f to i) spontaneous nodules formed in the absence of rhizobia. Bars are 250  $\mu$ m.

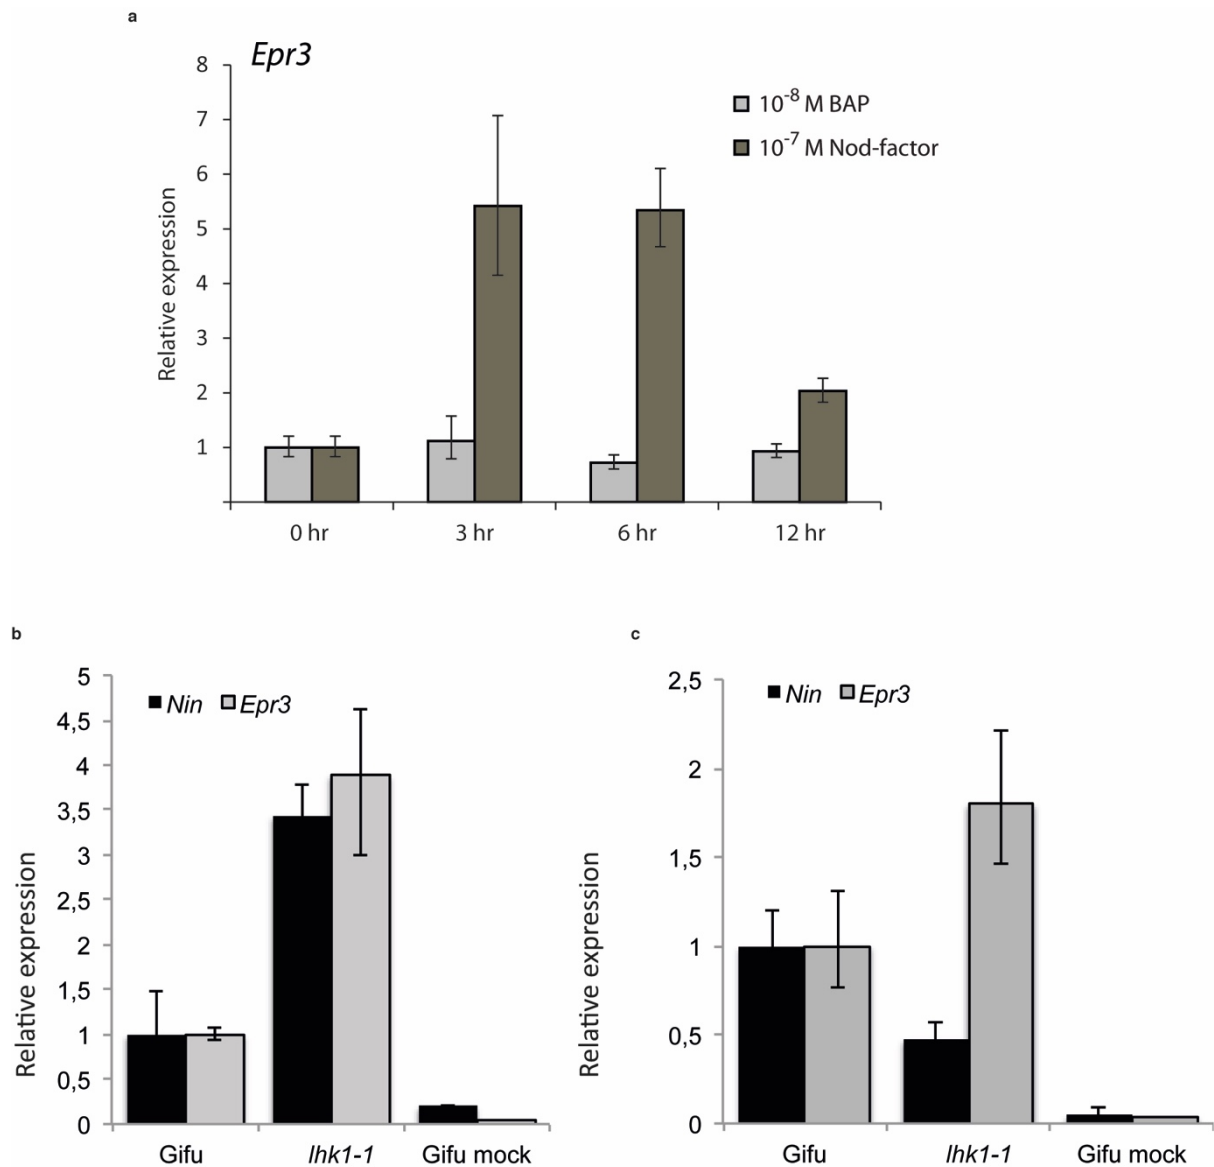

**Supplementary Figure 5. Relative expression of *Epr3***

(a) The graph shows *Epr3* transcript levels measured by RT-qPCR in Gifu roots treated with 10<sup>-8</sup> M BAP or 10<sup>-7</sup> M Nod factor for 3 to 12 hours relative to 0 h/mock treatment. (b, c) Transcript levels measured by RT-qPCR at (b) 3 dpi and (c) 14 dpi. Bars show 95% confidence interval.

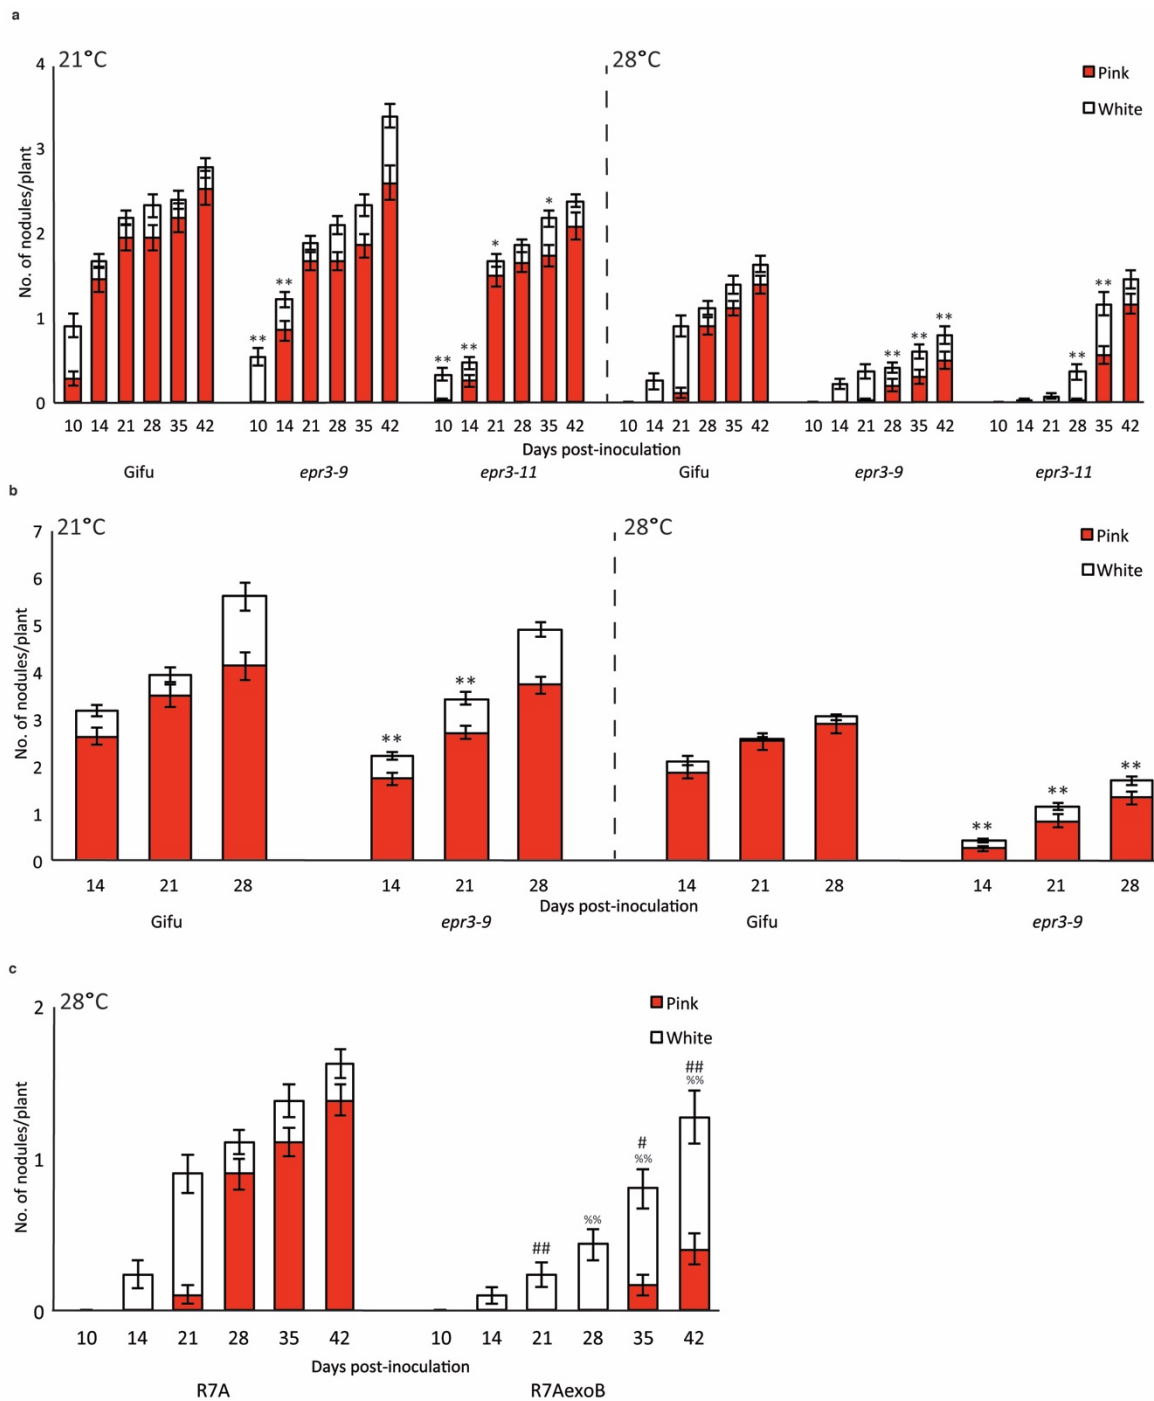

**Supplementary Figure 6. Nodulation kinetics of Gifu and *epr3* mutants at 21 °C or 28 °C.**

(a, b) Number of mature (pink) and immature (white) nodules formed by *L. japonicus* Gifu and *epr3-9* and *epr3-11* mutants after inoculation with *Mesorhizobium loti* R7A (a) or MAFF303099 (b), when grown at 21°C or 28°C. \* ( $p < 0.05$ , student's t-test,  $n \geq 29$ ) and \*\* ( $p < 0.01$ , student's t-test,  $n \geq 29$ ) indicate significant differences in the number of mature pink nodules formed on *epr3* mutants compared to Gifu. (c) Nodulation kinetics of *L. japonicus* Gifu inoculated with R7A or R7AexoB and grown at 28 °C. # ( $p < 0.05$ , student's t-test,  $n \geq 29$ ) and ## ( $p < 0.01$ , student's t-test,  $n \geq 29$ ) indicate significant differences in the number of mature pink nodules, and % ( $p < 0.05$ , student's t-test,  $n \geq 29$ ) and %% ( $p < 0.01$ , student's t-test,  $n \geq 29$ ) indicate significant differences in the number of immature white

nodules formed on Gifu inoculated with R7AexoB compared to R7A. These error bars are SE.



**Supplementary Table 1. *Epr3* promoter activity in *Lotus* symbiotic mutants.**

| Plant             | n= | <i>M. loti</i><br>inoculation | <i>pEpr3:GUS</i> expression |          | Nodule primordia |
|-------------------|----|-------------------------------|-----------------------------|----------|------------------|
|                   |    |                               | epidermal                   | cortical |                  |
| Gifu              | 58 | +                             | +                           | +        | +                |
| Gifu              | 9  | -                             | -                           | -        | -                |
| <i>nfr1-1</i>     | 15 | +                             | -                           | -        | -                |
| <i>nfr5-2</i>     | 13 | +                             | -                           | -        | -                |
| <i>symRK-3</i>    | 10 | +                             | -                           | -        | -                |
| <i>pollux-1</i>   | 25 | +                             | -                           | -        | -/(+)**          |
| <i>nup133-3</i>   | 20 | +                             | -                           | -        | -/(+)**          |
| <i>nenal-1</i>    | 16 | +                             | -                           | +        | -/(+)**          |
| <i>ccamk-13</i>   | 19 | +                             | -                           | -        | -                |
| <i>cyclops-2</i>  | 36 | +                             | -/(+)*                      | +        | +                |
| <i>cerberus-3</i> | 15 | +                             | +                           | +        | +                |
| <i>nsp1-1</i>     | 33 | +                             | +                           | +        | +                |
| <i>nsp2-3</i>     | 27 | +                             | -                           | -        | -                |
| <i>nin-2</i>      | 30 | +                             | +                           | -        | -                |
| <i>ern1-2</i>     | 54 | +                             | -                           | +        | +                |
| <i>nap-1</i>      | 25 | +                             | +                           | +        | +                |
| <i>pir-1</i>      | 10 | +                             | +                           | +        | +                |
| <i>lhk1-1</i>     | 15 | +                             | +                           | +        | +                |
| <i>har1</i>       | 17 | +                             | +                           | +        | +                |
| <i>snf1</i>       | 30 | -                             | -                           | +        | +                |
| <i>snf2</i>       | 15 | -                             | -                           | +        | +                |
| <i>snf1har1-3</i> | 10 | -                             | +                           | +        | +                |
| <i>snf2har1-3</i> | 7  | -                             | -                           | +        | +                |

\* a very reduced expression

\*\* temperature dependent for nodule formation

**Supplementary Table 2. List of EMSA probes and primer sets**

| name                      | sequence (5' to 3')                     | tag at 5'    |
|---------------------------|-----------------------------------------|--------------|
| Nin 1                     | ATACCCTGCCCTTACAGACAAGTATAAGAGGCACAAAA  | 6-FAM™ at 5' |
| Nin 1 complement          | TTTTGTGCCTCTTATACTTGTCTGTAAGGGCAGGGTAT  | -            |
| Nin 1 mutation            | ATACCCTGCCCTTTTCAGACAAGTACCCGAGGCACAAAA | 6-FAM™ at 5' |
| Nin 1 mutation complement | TTTTGTGCCTCGGGTACTTGTCTGAAAAGGCAGGGTAT  | -            |
| Ern1                      | TGTCATTGTTATAGCCGTCTGAGATCCCAC          | 6-FAM™ at 5' |
| Ern1 complement           | GTGGGATCTCAGACGGCTATAACAATGACA          | -            |
| Ern1 mutation             | TGTCATTGTTATATTTGTCTGAGATCCCAC          | 6-FAM™ at 5' |
| Ern1 mutation complement  | GTGGGATCTCAGACAAATATAACAATGACA          | -            |

|                         |                |                                                                    |
|-------------------------|----------------|--------------------------------------------------------------------|
| 684 bp                  | fw (5' to 3')  | CAACATAGATAAAAAACAATTAG                                            |
|                         | rev (5' to 3') | TTTCTTCAATGCAATGAGGAAG                                             |
| 329 bp                  | fw (5' to 3')  | GAAGTGGTGGACAGTCTGTG                                               |
|                         | rev (5' to 3') | TTTCTTCAATGCAATGAGGAAG                                             |
| 280 bp                  | fw (5' to 3')  | TTTGTCTTGTATAGCCGTCTG                                              |
|                         | rev (5' to 3') | TTTCTTCAATGCAATGAGGAAG                                             |
| 280 bp ERN1 mut (mut 1) | fw (5' to 3')  | TTTGTCTTGTATATTTGTCTG                                              |
|                         | rev (5' to 3') | TTTCTTCAATGCAATGAGGAAG                                             |
| 280 bp NIN1 mut (mut 2) | fw (5' to 3')  | TTTGTCTTGTATAGCCGTCTGAGATCCCACAAAAGATACCCGCTTTTCAGACAAGTACCCGAGGCA |
|                         | rev (5' to 3') | TTTCTTCAATGCAATGAGGAAG                                             |
| 257 bp                  | fw (5' to 3')  | AGATCCCACAAAAGATACCCTG                                             |
|                         | rev (5' to 3') | TTTCTTCAATGCAATGAGGAAG                                             |
| 257 bp NIN1 mut         | fw (5' to 3')  | AGATCCCACAAAAGATACCCTGCCCTTTTCAGACAAGTACCCGAGGCAC                  |
|                         | rev (5' to 3') | TTTCTTCAATGCAATGAGGAAG                                             |
| Nsp2 gene               | fw (5' to 3')  | ATGGAAATGGATATAGATTGCATC                                           |
|                         | rev (5' to 3') | CAGCTATGCACAATCTGATTCTG                                            |

All primers were added attB site for Gateway
